# Supplementary material for: Poly(γ-glutamic acid)/Silica Hybrids with Calcium Incorporated in the Silica Network by Use of a Calcium Alkoxide Precursor
Source: PubMed Central journal article supplement (PMC4506526; doi:10.1002/chem.201304013), 2014-05-18

# CHEMISTRY

## A **European** Journal

### Supporting Information

© Copyright Wiley-VCH Verlag GmbH & Co. KGaA, 69451 Weinheim, 2014

#### **Poly( $\gamma$ -glutamic acid)/Silica Hybrids with Calcium Incorporated in the Silica Network by Use of a Calcium Alkoxide Precursor**

Gowsihan Poologasundarampillai,<sup>\*[a]</sup> Bobo Yu,<sup>[a]</sup> Olga Tsigkou,<sup>[a, b]</sup> Daming Wang,<sup>[a]</sup> Frederik Romer,<sup>[c]</sup> Vineet Bhakhri,<sup>[a]</sup> Finn Giuliani,<sup>[a]</sup> Molly M. Stevens,<sup>[a, b]</sup> David S. McPhail,<sup>[a]</sup> Mark E. Smith,<sup>[c, d]</sup> John V. Hanna,<sup>[c]</sup> and Julian R. Jones<sup>\*[a]</sup>

chem\_201304013\_sm\_miscellaneous\_information.pdf

Supporting information 1: Mechanical properties of Class II  $\gamma$ -PGA/bioactive silica hybrids synthesised with calcium chloride (CaCl) or calcium methoxyethoxide (CaME) with molar ratios of  $\gamma$ -PGA : GPTMS of 2 dried at 60 °C. Traditional 70S30C bioactive glass synthesised with calcium nitrate and sintered at 800 °C was added for comparison. HF was added to the samples 2ECCaCl and 70S30C. (a) Stress/ strain traces (b) Yield stress as a function of height to width (H/W) ratio of the samples.

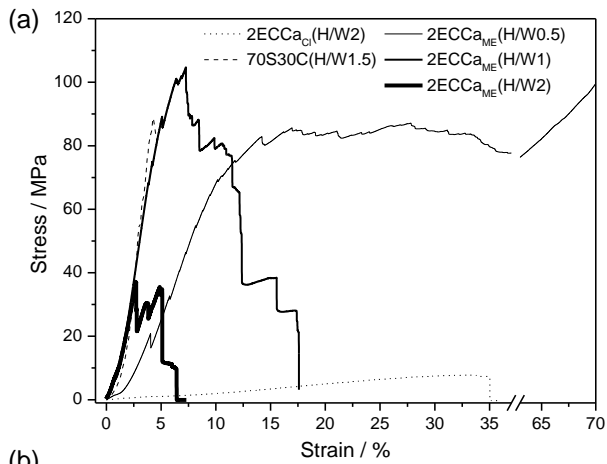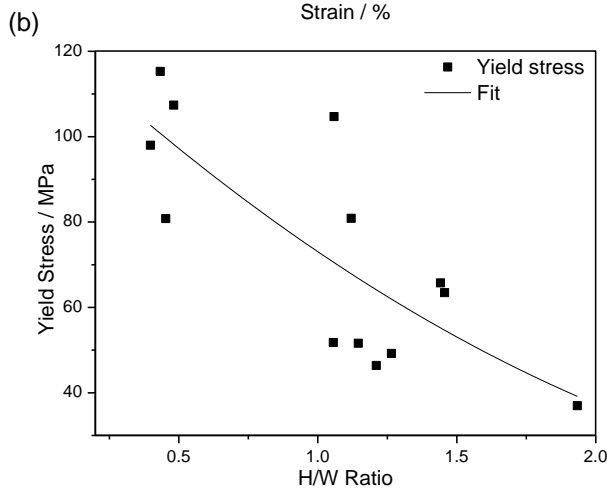

Figure 2. TOF SIMS images (a) Ca+, (b) Si+, (c) SiCaO+, (d) Si<sub>2</sub>O+, (e) CNOCa<sub>2</sub>+ and (f) Si<sub>2</sub>CHO<sub>3</sub>+ of 2ECCaME\*: Class II  $\gamma$ -PGA/bioactive silica hybrids synthesised with calcium methoxyethoxide (CaME) with molar ratios of  $\gamma$ -PGA : GPTMS of 2.

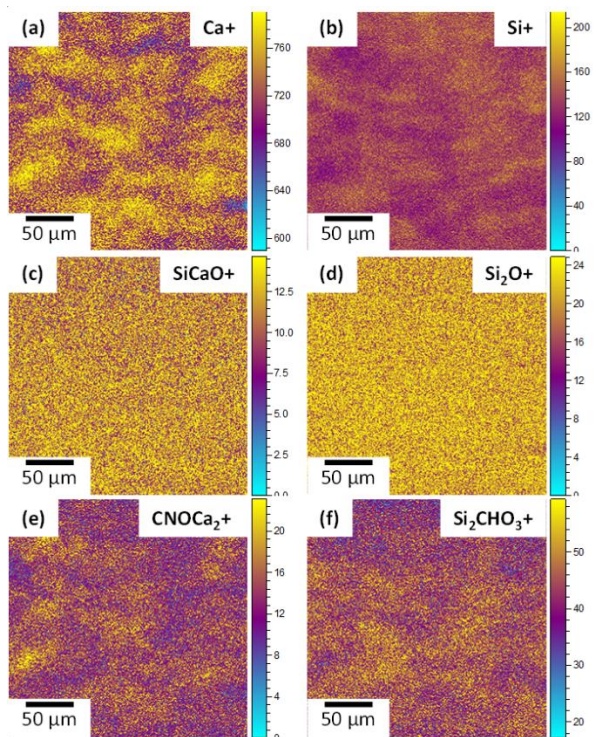

Figure 8. Human bone marrow derived mesenchymal stem cells (hMSCs) viability on 2ECCaME\*. (a) LIVE/DEADTM assay of the hMSCs cultured on the hybrids' surface for 7 days (live cells= green, dead cells = red - circled). Cells appear out of focus due to the (b) Metabolic activity as measured with the Alamar Blue assay after 4 and 7 days in culture. \* =  $p < 0.001$ .

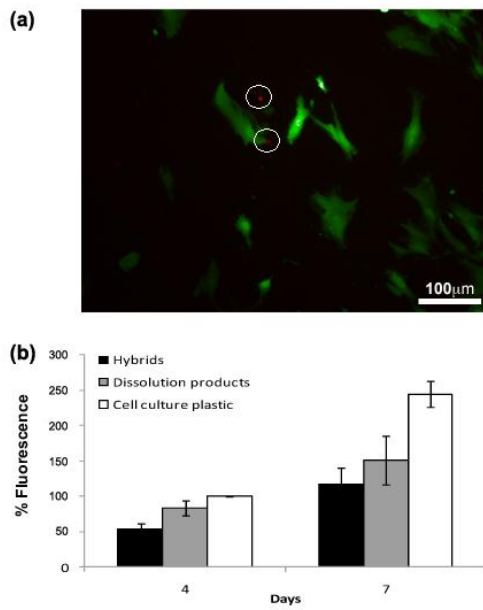

Supplement: chem0020-8149-sd1.pdf [file chem0020-8149-sd1.pdf]
